# Supplementary material for: Oral calcium and vitamin D supplements differentially alter exploratory, anxiety-like behaviors and memory in male rats
Source: PubMed Central journal article supplement (PMC10420380; doi:10.1371/journal.pone.0290106), 2023-08-11
Supplement: pone.0290106.s001.pdf [file pone.0290106.s001.pdf]

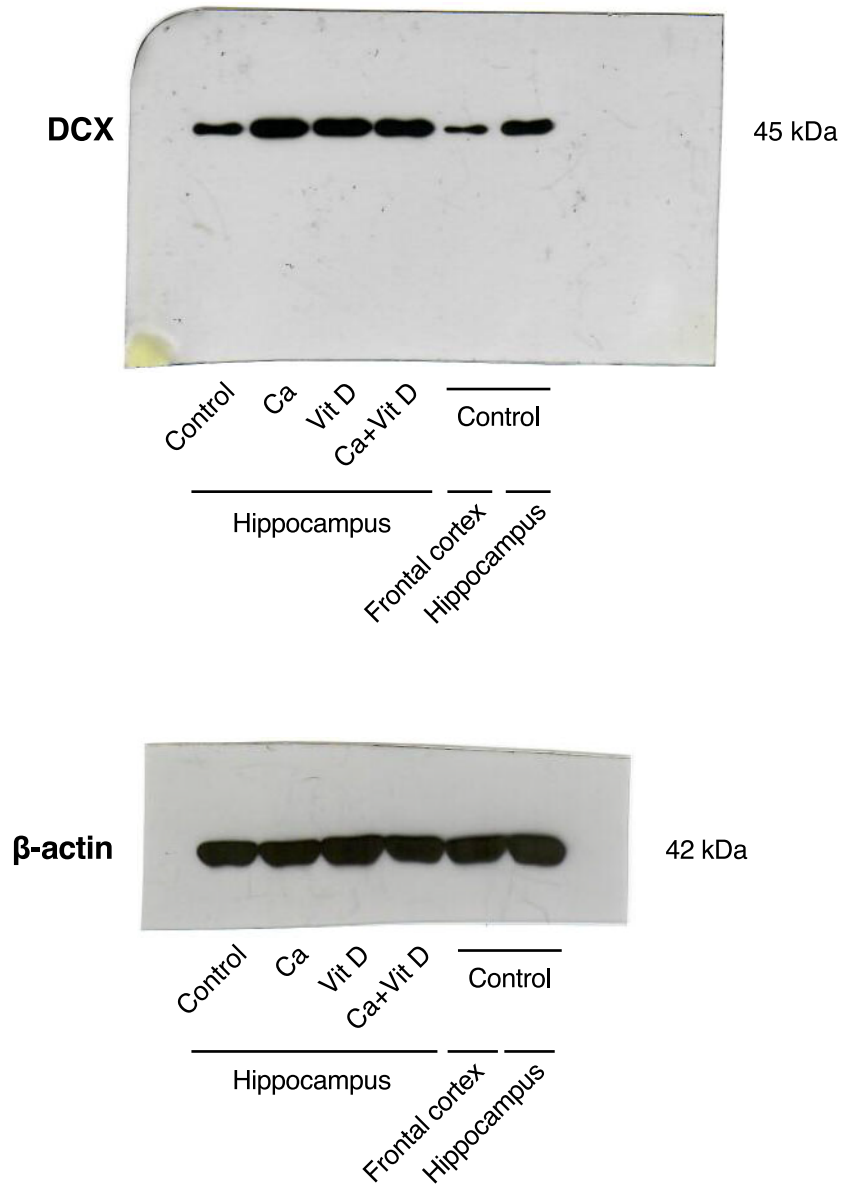

**Supplementary Figure S1:** Lapmanee et al.

Original blot images of Fig. 6A
