# Supplementary material for: Oral calcium and vitamin D supplements differentially alter exploratory, anxiety-like behaviors and memory in male rats
Source: PubMed Central journal article supplement (PMC10420380; doi:10.1371/journal.pone.0290106), 2023-08-11
Supplement: pone.0290106.s002.pdf [file pone.0290106.s002.pdf]

## RESEARCH DATA

**S1 Table.** Starting and final body weight of individual rats in control, calcium chloride (Ca), vitamin D<sub>3</sub> (Vit D), and (Ca+Vit D) group

| Body weight (kg)   | No. | Control              | Ca                   | Vit D                 | Ca+Vit D              |
|--------------------|-----|----------------------|----------------------|-----------------------|-----------------------|
| <b>Starting BW</b> | 1   | 201.70               | 205.40               | 206.80                | 207.10                |
|                    | 2   | 200.00               | 207.50               | 205.60                | 202.40                |
|                    | 3   | 206.50               | 198.80               | 213.20                | 198.00                |
|                    | 4   | 200.20               | 202.60               | 204.80                | 171.00                |
|                    | 5   | 198.80               | 230.00               | 230.00                | 220.00                |
|                    | 6   | 234.20               | 224.60               | 210.40                | 230.00                |
|                    | 7   | 224.50               | 209.90               | 200.00                | 203.70                |
|                    | 8   | 201.60               | 205.70               | 230.00                | 210.50                |
| <b>Mean ± SEM</b>  |     | <b>208.44 ± 4.72</b> | <b>210.56 ± 3.87</b> | <b>212.60 ± 4.04</b>  | <b>205.34 ± 6.12</b>  |
| <b>Final BW</b>    | 1   | 362.00               | 372.10               | 210.50                | 204.00                |
|                    | 2   | 340.80               | 382.10               | 220.00                | 277.00                |
|                    | 3   | 351.90               | 367.40               | 244.10                | 205.40                |
|                    | 4   | 370.80               | 344.20               | 189.80                | 282.50                |
|                    | 5   | 375.40               | 353.10               | 230.90                | 278.20                |
|                    | 6   | 400.00               | 397.30               | 212.50                | 153.50                |
|                    | 7   | 374.10               | 393.30               | 190.00                | 203.70                |
|                    | 8   | 381.10               | 376.10               | 314.00                | 210.50                |
| <b>Mean ± SEM</b>  |     | <b>369.52 ± 6.43</b> | <b>373.20 ± 6.48</b> | <b>226.48 ± 14.12</b> | <b>226.85 ± 16.59</b> |

**S2 Table.** Food and water intakes of each rat in control, calcium chloride (Ca), vitamin D<sub>3</sub> (Vit D), and (Ca+Vit D) group

|                            | No. | Control             | Ca                  | Vit D               | Ca+Vit D            |
|----------------------------|-----|---------------------|---------------------|---------------------|---------------------|
| <b>Food intake (g/day)</b> | 1   | 18.02               | 20.00               | 14.96               | 13.94               |
|                            | 2   | 18.22               | 18.34               | 12.5                | 16.54               |
|                            | 3   | 18.58               | 18.9                | 16.52               | 12.62               |
|                            | 4   | 19.00               | 17.88               | 12.02               | 17.44               |
|                            | 5   | 19.48               | 19.34               | 13.52               | 13.76               |
|                            | 6   | 20.16               | 20.22               | 13.44               | 13.56               |
|                            | 7   | 18.96               | 19.36               | 16.34               | 13.40               |
|                            | 8   | 21.18               | 18.5                | 18.28               | 13.06               |
| <b>Mean ± SEM</b>          |     | <b>19.20 ± 0.37</b> | <b>19.07 ± 0.28</b> | <b>14.70 ± 0.77</b> | <b>14.29 ± 0.61</b> |
| <b>Drinking (mL/day)</b>   | 1   | 24.80               | 32.88               | 35.66               | 26.14               |
|                            | 2   | 34.92               | 29.70               | 33.88               | 25.48               |
|                            | 3   | 32.78               | 30.28               | 36.84               | 24.70               |
|                            | 4   | 28.64               | 33.76               | 39.10               | 34.70               |
|                            | 5   | 25.06               | 31.62               | 30.70               | 37.62               |
|                            | 6   | 28.18               | 29.80               | 34.68               | 40.28               |
|                            | 7   | 39.20               | 35.90               | 34.98               | 45.14               |
|                            | 8   | 25.26               | 31.62               | 58.92               | 44.52               |
| <b>Mean ± SEM</b>          |     | <b>19.86 ± 1.87</b> | <b>31.95 ± 0.76</b> | <b>38.10 ± 3.09</b> | <b>34.82 ± 2.99</b> |

**S3 Table.** Serum and urinary calcium and serum 25(OH)D<sub>3</sub> of each rat in control, calcium chloride (Ca), vitamin D<sub>3</sub> (Vit D), and (Ca+Vit D) group

|                                             | No. | Control             | Ca                  | Vit D                | Ca+Vit D              |
|---------------------------------------------|-----|---------------------|---------------------|----------------------|-----------------------|
| <b>Serum calcium</b><br>(mg/dL)             | 1   | 12.00               | 11.40               | 11.00                | 11.40                 |
|                                             | 2   | 11.50               | 11.30               | 11.00                | 11.00                 |
|                                             | 3   | 11.60               | 11.70               | 10.20                | 12.80                 |
|                                             | 4   | 11.60               | 11.40               | 12.00                | 11.20                 |
|                                             | 5   | 11.60               | 13.30               | 12.10                | 10.60                 |
|                                             | 6   | 12.50               | 12.50               | 9.50                 | 10.50                 |
|                                             | 7   | 11.30               | 12.00               | 10.20                | 12.00                 |
|                                             | 8   | 10.00               | 11.00               | 12.00                | 12.50                 |
| <b>Mean ± SEM</b>                           |     | <b>11.52 ± 0.25</b> | <b>11.83 ± 0.27</b> | <b>11.00 ± 0.35</b>  | <b>11.50 ± 0.30</b>   |
| <b>Urinary calcium</b><br>(mg/dL)           | 1   | 22.50               | 47.80               | 15.3                 | 22.00                 |
|                                             | 2   | 22.60               | 34.90               | 20.00                | 19.80                 |
|                                             | 3   | 40.10               | 29.90               | 14.40                | 19.70                 |
|                                             | 4   | 33.90               | 51.40               | 34.80                | 25.70                 |
|                                             | 5   | 26.60               | 65.00               | 18.90                | 33.40                 |
|                                             | 6   | 30.00               | 30.00               | 20.00                | 20.00                 |
|                                             | 7   | 35.00               | 35.00               | 30.00                | 35.00                 |
|                                             | 8   | 20.00               | 40.00               | 25.00                | 30.00                 |
| <b>Mean ± SEM</b>                           |     | <b>28.84 ± 2.51</b> | <b>41.75 ± 4.32</b> | <b>22.30 ± 2.52</b>  | <b>25.70 ± 2.24</b>   |
| <b>Serum 25(OH)D<sub>3</sub></b><br>(ng/dL) | 1   | 63.70               | 52.60               | 81.20                | 195.60                |
|                                             | 2   | 50.00               | 54.40               | 117.00               | 87.60                 |
|                                             | 3   | 60.70               | 50.40               | 138.00               | 164.40                |
|                                             | 4   | 48.60               | 61.60               | 138.00               | 103.00                |
|                                             | 5   | 53.30               | 58.90               | 148.00               | 110.00                |
|                                             | 6   | 60.00               | 50.00               | 90.00                | 115.00                |
|                                             | 7   | 65.00               | 60.00               | 120.00               | 100.00                |
|                                             | 8   | 75.00               | 70.00               | 100.00               | 95.00                 |
| <b>Mean ± SEM</b>                           |     | <b>59.54 ± 3.10</b> | <b>57.24 ± 2.39</b> | <b>116.53 ± 8.61</b> | <b>121.33 ± 13.47</b> |

**S4 Table.** Raw data of the parameters measured by Elevated plus-maze (EPM) test in control, calcium chloride (Ca), vitamin D<sub>3</sub> (Vit D), and (Ca+Vit D) group

|                         | No. | Control             | Ca                  | Vit D               | Ca+Vit D            |
|-------------------------|-----|---------------------|---------------------|---------------------|---------------------|
| <b>% Open arm time</b>  | 1   | 76.25               | 70.45               | 80.18               | 66.65               |
|                         | 2   | 76.85               | 81.12               | 93.34               | 70.42               |
|                         | 3   | 95.10               | 67.76               | 63.41               | 76.95               |
|                         | 4   | 82.39               | 51.16               | 71.85               | 74.00               |
|                         | 5   | 52.76               | 75.33               | 68.55               | 64.07               |
|                         | 6   | 37.49               | 28.28               | 82.75               | 80.01               |
|                         | 7   | 52.56               | 41.18               | 82.61               | 63.34               |
|                         | 8   | 38.88               | 37.79               | 73.48               | 67.41               |
| <b>Mean ± SEM</b>       |     | <b>64.04 ± 7.57</b> | <b>56.63 ± 6.93</b> | <b>77.02 ± 3.37</b> | <b>70.36 ± 2.16</b> |
| <b>% Open arm entry</b> | 1   | 22.50               | 47.80               | 15.3                | 22.00               |
|                         | 2   | 22.60               | 34.90               | 20.00               | 19.80               |
|                         | 3   | 40.10               | 29.90               | 14.40               | 19.70               |
|                         | 4   | 33.90               | 51.40               | 34.80               | 25.70               |
|                         | 5   | 26.60               | 65.00               | 18.90               | 33.40               |
|                         | 6   | 30.00               | 30.00               | 20.00               | 20.00               |
|                         | 7   | 35.00               | 35.00               | 30.00               | 35.00               |
|                         | 8   | 20.00               | 40.00               | 25.00               | 30.00               |
| <b>Mean ± SEM</b>       |     | <b>54.57 ± 5.01</b> | <b>52.45 ± 4.42</b> | <b>66.69 ± 3.96</b> | <b>65.43 ± 2.29</b> |
| <b>Anxiety index</b>    | 1   | 0.35                | 0.33                | 0.27                | 0.35                |
|                         | 2   | 0.28                | 0.32                | 0.11                | 0.37                |
|                         | 3   | 0.12                | 0.38                | 0.37                | 0.23                |
|                         | 4   | 0.28                | 0.52                | 0.32                | 0.30                |
|                         | 5   | 0.52                | 0.26                | 0.35                | 0.37                |
|                         | 6   | 0.62                | 0.69                | 0.27                | 0.27                |
|                         | 7   | 0.52                | 0.56                | 0.19                | 0.37                |
|                         | 8   | 0.58                | 0.58                | 0.38                | 0.32                |
| <b>Mean ± SEM</b>       |     | <b>0.41 ± 0.06</b>  | <b>0.46 ± 0.05</b>  | <b>0.28 ± 0.03</b>  | <b>0.32 ± 0.02</b>  |

**S5 Table.** Raw data of the parameters measured by Open field test (OFT) in control, calcium chloride (Ca), vitamin D<sub>3</sub> (Vit D), and (Ca+Vit D) group

|                            | No. | Control               | Ca                    | Vit D                 | Ca+Vit D              |
|----------------------------|-----|-----------------------|-----------------------|-----------------------|-----------------------|
| <b>Inner zone time (s)</b> | 1   | 64.87                 | 138.21                | 155.96                | 127.29                |
|                            | 2   | 138.90                | 160.52                | 103.50                | 55.53                 |
|                            | 3   | 152.20                | 115.19                | 152.85                | 80.37                 |
|                            | 4   | 205.21                | 112.41                | 132.17                | 149.42                |
|                            | 5   | 92.78                 | 82.00                 | 84.00                 | 107.06                |
|                            | 6   | 92.68                 | 69.68                 | 99.46                 | 122.22                |
|                            | 7   | 72.89                 | 63.21                 | 90.00                 | 200.13                |
|                            | 8   | 159.89                | 102.14                | 102.69                | 148.37                |
| <b>Mean ± SEM</b>          |     | <b>122.3 ± 17.40</b>  | <b>105.42 ± 11.86</b> | <b>115.08 ± 9.93</b>  | <b>123.80 ± 15.77</b> |
| <b>Outer zone time (s)</b> | 1   | 235.13                | 161.79                | 144.04                | 172.71                |
|                            | 2   | 161.10                | 139.48                | 196.5                 | 244.47                |
|                            | 3   | 147.80                | 184.81                | 147.15                | 219.63                |
|                            | 4   | 94.79                 | 187.59                | 167.83                | 150.58                |
|                            | 5   | 207.22                | 218.00                | 216.00                | 192.94                |
|                            | 6   | 207.32                | 230.32                | 200.54                | 177.78                |
|                            | 7   | 227.11                | 236.79                | 210.00                | 99.87                 |
|                            | 8   | 140.11                | 197.86                | 197.31                | 151.63                |
| <b>Mean ± SEM</b>          |     | <b>177.57 ± 17.40</b> | <b>194.58 ± 11.86</b> | <b>184.92 ± 9.93</b>  | <b>176.20 ± 15.77</b> |
| <b>Total lines crossed</b> | 1   | 111                   | 174                   | 128                   | 134                   |
|                            | 2   | 215                   | 160                   | 125                   | 207                   |
|                            | 3   | 148                   | 225                   | 144                   | 124                   |
|                            | 4   | 195                   | 269                   | 199                   | 165                   |
|                            | 5   | 230                   | 232                   | 130                   | 106                   |
|                            | 6   | 174                   | 211                   | 113                   | 225                   |
|                            | 7   | 188                   | 281                   | 120                   | 138                   |
|                            | 8   | 200                   | 232                   | 200                   | 200                   |
| <b>Mean ± SEM</b>          |     | <b>182.63 ± 13.48</b> | <b>223.00 ± 14.74</b> | <b>144.88 ± 12.32</b> | <b>162.38 ± 15.46</b> |

**S5 Table.** Raw data of the parameters detected by Open field test (OFT) in control, calcium chloride (Ca), vitamin D<sub>3</sub> (Vit D), and (Ca+Vit D) group (continue)

|                        | No. | Control             | Ca                  | Vit D               | Ca+Vit D            |
|------------------------|-----|---------------------|---------------------|---------------------|---------------------|
| <b>Rearing (time)</b>  | 1   | 40                  | 40                  | 21                  | 35                  |
|                        | 2   | 26                  | 46                  | 46                  | 29                  |
|                        | 3   | 40                  | 52                  | 37                  | 32                  |
|                        | 4   | 43                  | 65                  | 51                  | 42                  |
|                        | 5   | 41                  | 55                  | 49                  | 25                  |
|                        | 6   | 24                  | 55                  | 44                  | 66                  |
|                        | 7   | 30                  | 51                  | 20                  | 62                  |
|                        | 8   | 28                  | 50                  | 54                  | 65                  |
| <b>Mean ± SEM</b>      |     | <b>34.00 ± 2.73</b> | <b>51.75 ± 2.58</b> | <b>40.25 ± 4.67</b> | <b>44.50 ± 6.07</b> |
| <b>Grooming (time)</b> | 1   | 2                   | 2                   | 2                   | 2                   |
|                        | 2   | 3                   | 2                   | 2                   | 2                   |
|                        | 3   | 1                   | 1                   | 1                   | 2                   |
|                        | 4   | 1                   | 1                   | 2                   | 4                   |
|                        | 5   | 3                   | 2                   | 3                   | 3                   |
|                        | 6   | 3                   | 1                   | 4                   | 3                   |
|                        | 7   | 2                   | 2                   | 0                   | 3                   |
|                        | 8   | 0                   | 3                   | 2                   | 2                   |
| <b>Mean ± SEM</b>      |     | <b>1.88 ± 0.40</b>  | <b>1.75 ± 0.25</b>  | <b>2.00 ± 0.42</b>  | <b>2.63 ± 0.26</b>  |

**S6 Table.** Raw data of the parameters measured by Novel object recognition (NOR) in control, calcium chloride (Ca), vitamin D<sub>3</sub> (Vit D), and (Ca+Vit D) group

|                          | No. | Control              | Ca                   | Vit D                | Ca+Vit D             |
|--------------------------|-----|----------------------|----------------------|----------------------|----------------------|
| <b>Total exploration</b> | 1   | 41.02                | 58.14                | 77.3                 | 103.58               |
| <b>time (s)</b>          | 2   | 34.11                | 56.39                | 52.91                | 96.77                |
|                          | 3   | 122.76               | 121.29               | 88.31                | 33.76                |
|                          | 4   | 100.46               | 108.76               | 102.2                | 143.07               |
|                          | 5   | 81.37                | 44.32                | 74.15                | 74.79                |
|                          | 6   | 24.61                | 108.36               | 126.21               | 81.44                |
|                          | 7   | 56.43                | 90.51                | 58.92                | 60.78                |
|                          | 8   | 78.84                | 82.62                | 21.79                | 107.74               |
| <b>Mean ± SEM</b>        |     | <b>67.45 ± 12.13</b> | <b>83.80 ± 10.04</b> | <b>75.22 ± 11.28</b> | <b>87.74 ± 11.68</b> |
| <b>Recognition index</b> | 1   | 51.24                | 66.70                | 31.88                | 74.71                |
| <b>(%)</b>               | 2   | 30.46                | 79.11                | 24.40                | 46.51                |
|                          | 3   | 20.64                | 33.09                | 16.68                | 58.59                |
|                          | 4   | 32.59                | 28.54                | 58.85                | 40.41                |
|                          | 5   | 31.65                | 39.94                | 24.72                | 29.88                |
|                          | 6   | 22.31                | 67.08                | 31.07                | 53.86                |
|                          | 7   | 27.49                | 45.34                | 54.35                | 28.96                |
|                          | 8   | 26.10                | 41.75                | 39.51                | 49.69                |
| <b>Mean ± SEM</b>        |     | <b>30.31 ± 3.35</b>  | <b>50.19 ± 6.49</b>  | <b>35.18 ± 5.25</b>  | <b>47.83 ± 5.37</b>  |

**S7 Table.** Data of doublecortin expression and TUNEL-positive cells in hippocampus in control, calcium chloride (Ca), vitamin D<sub>3</sub> (Vit D), and (Ca+Vit D) group

|                                                 | No. | Control                           | Ca                                | Vit D                             | Ca+Vit D                          |
|-------------------------------------------------|-----|-----------------------------------|-----------------------------------|-----------------------------------|-----------------------------------|
| <b>DCX protein</b>                              | 1   | 1.00                              | 2.98                              | 3.31                              | 3.04                              |
| <b>(Normalized to <math>\beta</math>-actin)</b> | 2   | 1.00                              | 3.11                              | 1.05                              | 1.68                              |
|                                                 | 3   | 1.00                              | 0.95                              | 2.06                              | 1.15                              |
|                                                 | 4   | 1.00                              | 1.87                              | 2.40                              | 0.73                              |
|                                                 | 5   | 1.00                              | 2.33                              | 1.57                              | 5.20                              |
|                                                 | 6   | 1.00                              | 1.89                              | 3.82                              | 2.10                              |
|                                                 | 7   | 1.00                              | 2.00                              | 2.50                              | 2.50                              |
|                                                 | 8   | 1.00                              | 2.50                              | 3.50                              | 2.50                              |
| <b>Mean <math>\pm</math> SEM</b>                |     | <b>1.00 <math>\pm</math> 0.00</b> | <b>2.20 <math>\pm</math> 0.25</b> | <b>2.52 <math>\pm</math> 0.34</b> | <b>2.23 <math>\pm</math> 0.49</b> |
| <b>TUNEL-positive cells (%)</b>                 | 1   | 0.19                              | 0.39                              | 0.55                              | 0.19                              |
|                                                 | 2   | 1.58                              | 3.07                              | 4.78                              | 2.31                              |
|                                                 | 3   | 2.35                              | 6.23                              | 11.02                             | 14.81                             |
|                                                 | 4   | 6.71                              | 13.71                             | 15.49                             | 15.22                             |
| <b>Mean <math>\pm</math> SEM</b>                |     | <b>2.71 <math>\pm</math> 1.41</b> | <b>5.85 <math>\pm</math> 2.88</b> | <b>7.96 <math>\pm</math> 3.31</b> | <b>8.13 <math>\pm</math> 4.00</b> |
